# Supplementary material for: Commercially available InSb as a high-performance anode for secondary batteries towards superior lithium storage
Source: Royal Society of Chemistry journal article supplement (doi:10.1039/c9se00429g), 2019-01-01
Supplement: c9se00429g1.pdf [file c9se00429g1.pdf]

## Supporting Information

### Commercially available InSb as high-performance anode of secondary battery towards superior lithium storage

*Wenying Li <sup>a,1</sup>, Tingting Liu <sup>a,1</sup>, Jundong Zhang <sup>a,1</sup>, Na Peng <sup>a</sup>, Runtian Zheng <sup>a</sup>,  
Haoliang Yu <sup>a</sup>, Ying Bai <sup>b,\*</sup>, Yanhua Cui <sup>c,\*</sup>, Jie Shu <sup>a,\*</sup>*

*<sup>a</sup> Faculty of Materials Science and Chemical Engineering, Ningbo University, Ningbo  
315211, Zhejiang, China*

*<sup>b</sup> Henan Key Laboratory of Photovoltaic Materials and School of Physics &  
Electronics, Henan University, Kaifeng 475004, Henan, China*

*<sup>c</sup> Institute of Electronic Engineering, China Academy of Engineering Physics,  
Mianyang 621000, Sichuan, China*

*<sup>1</sup> These authors contributed equally to this work.*

\* Corresponding author: Jie Shu

E-mail: shujie@nbu.edu.cn

\* Corresponding author: Ying Bai

E-mail: ybai@henu.edu.cn

\* Corresponding author: Yanhua Cui

E-mail: [cuiyanhua@netease.com](mailto:cuiyanhua@netease.com)

## Electrochemical Test and Analysis

Electrochemical performance of InSb was studied by using CR2032-type coin cells assembled in an argon-filled glove-box. The metallic lithium foil was used as counter electrode, and the porous polypropylene film was used as the separator. Next, 1 mol L<sup>-1</sup> LiPF<sub>6</sub> in ethylene carbonate and dimethyl carbonate (1:1 v/v) consists of the electrolyte. The as-assembled batteries were galvanostatically discharged/charged at room temperature with a LANHE CT2001A battery test system in a voltage range of 0-3.0 V. The CV of the cells was analyzed on an electrochemical workstation (CHI660E) between 0 and 3.0 V. Electrochemical impedance spectroscopy (EIS) were performed on an electrochemical workstation (CHI660D) in the frequency range from 0.01 to 100,000 Hz.

The same Bruker D8 Focus X-ray diffraction apparatus was got to characterize the in-situ XRD of InSb at the 2θ range from 20° to 50°. Besides, the electrochemical tests during in-situ XRD were performed using a battery tester with a voltage window of 0-3.0 V and a current density of 30 mA g<sup>-1</sup>.
